# Supplementary material for: A Comparative Analysis of the In Vitro Anticancer Activity of Iridium(III) {η5-C5Me4R} Complexes with Variable R Groups
Source: MDPI journal article supplement (doi:10.3390/ijms22147422), 2021-07-10

# checkCIF/PLATON report

Structure factors have been supplied for datablock(s) 2b, 3

THIS REPORT IS FOR GUIDANCE ONLY. IF USED AS PART OF A REVIEW PROCEDURE FOR PUBLICATION, IT SHOULD NOT REPLACE THE EXPERTISE OF AN EXPERIENCED CRYSTALLOGRAPHIC REFEREE.

No syntax errors found.      CIF dictionary      Interpreting this report

## Datablock: 3

---

|                 |                     |                               |
|-----------------|---------------------|-------------------------------|
| Bond precision: | C-C = 0.0046 A      | Wavelength=0.71073            |
| Cell:           | a=13.9835(5)        | b=8.8692(3)      c=15.3611(6) |
|                 | alpha=90            | beta=96.317(2)      gamma=90  |
| Temperature:    | 293 K               |                               |
|                 | Calculated          | Reported                      |
| Volume          | 1893.55(12)         | 1893.55(12)                   |
| Space group     | P 21/c              | P 21/c                        |
| Hall group      | -P 2ybc             | -P 2ybc                       |
| Moiety formula  | C17 H23 Cl2 Ir O2 S | ?                             |
| Sum formula     | C17 H23 Cl2 Ir O2 S | C17 H23 Cl2 Ir O2 S           |
| Mr              | 554.53              | 554.51                        |
| Dx,g cm-3       | 1.945               | 1.945                         |
| Z               | 4                   | 4                             |
| Mu (mm-1)       | 7.449               | 7.449                         |
| F000            | 1072.0              | 1072.0                        |
| F000'           | 1068.50             |                               |
| h,k,lmax        | 17,10,18            | 17,10,18                      |
| Nref            | 3716                | 3715                          |
| Tmin,Tmax       | 0.325,0.475         | 0.381,0.746                   |
| Tmin'           | 0.252               |                               |

Correction method= # Reported T Limits: Tmin=0.381 Tmax=0.746  
AbsCorr = EMPIRICAL

Data completeness= 1.000      Theta(max)= 25.992

R(reflections)= 0.0193( 3414)      wR2(reflections)= 0.0487( 3715)

S = 1.068      Npar= 217

---

The following ALERTS were generated. Each ALERT has the format  
**test-name\_ALERT\_alert-type\_alert-level.**  
Click on the hyperlinks for more details of the test.

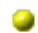

### Alert level C

PLAT480\_ALERT\_4\_C Long H...A H-Bond Reported H1 ..S1 . 3.00 Ang.  
 PLAT911\_ALERT\_3\_C Missing FCF Refl Between Thmin & STh/L= 0.600 2 Report

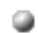

### Alert level G

PLAT002\_ALERT\_2\_G Number of Distance or Angle Restraints on AtSite 2 Note  
 PLAT172\_ALERT\_4\_G The CIF-Embedded .res File Contains DFIX Records 1 Report  
 PLAT199\_ALERT\_1\_G Reported \_cell\_measurement\_temperature ..... (K) 293 Check  
 PLAT200\_ALERT\_1\_G Reported \_diffrn\_ambient\_temperature ..... (K) 293 Check  
 PLAT860\_ALERT\_3\_G Number of Least-Squares Restraints ..... 1 Note  
 PLAT883\_ALERT\_1\_G No Info/Value for \_atom\_sites\_solution\_primary . Please Do !  
 PLAT913\_ALERT\_3\_G Missing # of Very Strong Reflections in FCF .... 1 Note  
 PLAT933\_ALERT\_2\_G Number of OMIT Records in Embedded .res File ... 2 Note  
 PLAT978\_ALERT\_2\_G Number C-C Bonds with Positive Residual Density. 3 Info

0 **ALERT level A** = Most likely a serious problem - resolve or explain  
 0 **ALERT level B** = A potentially serious problem, consider carefully  
 2 **ALERT level C** = Check. Ensure it is not caused by an omission or oversight  
 9 **ALERT level G** = General information/check it is not something unexpected

3 ALERT type 1 CIF construction/syntax error, inconsistent or missing data  
 3 ALERT type 2 Indicator that the structure model may be wrong or deficient  
 3 ALERT type 3 Indicator that the structure quality may be low  
 2 ALERT type 4 Improvement, methodology, query or suggestion  
 0 ALERT type 5 Informative message, check

## Datablock: 2b

Bond precision: C-C = 0.0087 A

Wavelength=0.71073

Cell: a=14.4923(5) b=7.3769(3) c=15.5178(5)  
 alpha=90 beta=95.905(1) gamma=90  
 Temperature: 100 K

|                | Calculated      | Reported        |
|----------------|-----------------|-----------------|
| Volume         | 1650.18(10)     | 1650.18(10)     |
| Space group    | P 21/n          | P 21/n          |
| Hall group     | -P 2yn          | -P 2yn          |
| Moiety formula | C20 H21 Cl Ir N | ?               |
| Sum formula    | C20 H21 Cl Ir N | C20 H21 Cl Ir N |
| Mr             | 503.05          | 503.03          |
| Dx,g cm-3      | 2.025           | 2.025           |
| Z              | 4               | 4               |
| Mu (mm-1)      | 8.251           | 8.251           |
| F000           | 968.0           | 968.0           |
| F000'          | 963.38          |                 |
| h,k,lmax       | 17,9,19         | 17,9,19         |
| Nref           | 3236            | 3237            |
| Tmin,Tmax      | 0.287,0.438     | 0.220,0.336     |
| Tmin'          | 0.257           |                 |

Correction method= # Reported T Limits: Tmin=0.220 Tmax=0.336  
AbsCorr = EMPIRICAL

Data completeness= 1.000

Theta(max)= 25.999

R(reflections)= 0.0275( 3186)

wR2(reflections)= 0.0702( 3237)

S = 1.390

Npar= 213

---

The following ALERTS were generated. Each ALERT has the format  
**test-name\_ALERT\_alert-type\_alert-level.**  
Click on the hyperlinks for more details of the test.

---

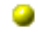

#### Alert level C

|                   |                                                  |              |
|-------------------|--------------------------------------------------|--------------|
| PLAT342_ALERT_3_C | Low Bond Precision on C-C Bonds .....            | 0.00867 Ang. |
| PLAT906_ALERT_3_C | Large K Value in the Analysis of Variance .....  | 2.643 Check  |
| PLAT934_ALERT_3_C | Number of (Iobs-Icalc)/Sigma(W) > 10 Outliers .. | 1 Check      |
| PLAT971_ALERT_2_C | Check Calcd Resid. Dens. 1.61A From C3           | 1.80 eA-3    |
| PLAT971_ALERT_2_C | Check Calcd Resid. Dens. 1.31A From C12          | 1.74 eA-3    |
| PLAT971_ALERT_2_C | Check Calcd Resid. Dens. 0.92A From Ir1          | 1.51 eA-3    |
| PLAT972_ALERT_2_C | Check Calcd Resid. Dens. 0.74A From Ir1          | -2.31 eA-3   |
| PLAT972_ALERT_2_C | Check Calcd Resid. Dens. 0.95A From Ir1          | -1.55 eA-3   |
| PLAT977_ALERT_2_C | Check Negative Difference Density on H11H        | -0.35 eA-3   |

---

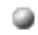

#### Alert level G

|                   |                                                  |             |
|-------------------|--------------------------------------------------|-------------|
| PLAT003_ALERT_2_G | Number of Uiso or Uij Restrained non-H Atoms ... | 6 Report    |
| PLAT083_ALERT_2_G | SHELXL Second Parameter in WGHT Unusually Large  | 18.10 Why ? |
| PLAT168_ALERT_4_G | The CIF-Embedded .res File Contains EXYZ Records | 2 Report    |
| PLAT171_ALERT_4_G | The CIF-Embedded .res File Contains EADP Records | 2 Report    |
| PLAT186_ALERT_4_G | The CIF-Embedded .res File Contains ISOR Records | 1 Report    |
| PLAT301_ALERT_3_G | Main Residue Disorder .....(Resd 1 )             | 9% Note     |
| PLAT380_ALERT_4_G | Incorrectly? Oriented X(sp2)-Methyl Moiety ..... | C113 Check  |
| PLAT860_ALERT_3_G | Number of Least-Squares Restraints .....         | 36 Note     |
| PLAT883_ALERT_1_G | No Info/Value for _atom_sites_solution_primary . | Please Do ! |
| PLAT978_ALERT_2_G | Number C-C Bonds with Positive Residual Density. | 1 Info      |

---

- 0 **ALERT level A** = Most likely a serious problem - resolve or explain  
0 **ALERT level B** = A potentially serious problem, consider carefully  
9 **ALERT level C** = Check. Ensure it is not caused by an omission or oversight  
10 **ALERT level G** = General information/check it is not something unexpected

- 1 ALERT type 1 CIF construction/syntax error, inconsistent or missing data  
9 ALERT type 2 Indicator that the structure model may be wrong or deficient  
5 ALERT type 3 Indicator that the structure quality may be low  
4 ALERT type 4 Improvement, methodology, query or suggestion  
0 ALERT type 5 Informative message, check
- 
-

It is advisable to attempt to resolve as many as possible of the alerts in all categories. Often the minor alerts point to easily fixed oversights, errors and omissions in your CIF or refinement strategy, so attention to these fine details can be worthwhile. In order to resolve some of the more serious problems it may be necessary to carry out additional measurements or structure refinements. However, the purpose of your study may justify the reported deviations and the more serious of these should normally be commented upon in the discussion or experimental section of a paper or in the "special\_details" fields of the CIF. checkCIF was carefully designed to identify outliers and unusual parameters, but every test has its limitations and alerts that are not important in a particular case may appear. Conversely, the absence of alerts does not guarantee there are no aspects of the results needing attention. It is up to the individual to critically assess their own results and, if necessary, seek expert advice.

### **Publication of your CIF in IUCr journals**

A basic structural check has been run on your CIF. These basic checks will be run on all CIFs submitted for publication in IUCr journals (*Acta Crystallographica*, *Journal of Applied Crystallography*, *Journal of Synchrotron Radiation*); however, if you intend to submit to *Acta Crystallographica Section C* or *E* or *IUCrData*, you should make sure that full publication checks are run on the final version of your CIF prior to submission.

### **Publication of your CIF in other journals**

Please refer to the *Notes for Authors* of the relevant journal for any special instructions relating to CIF submission.

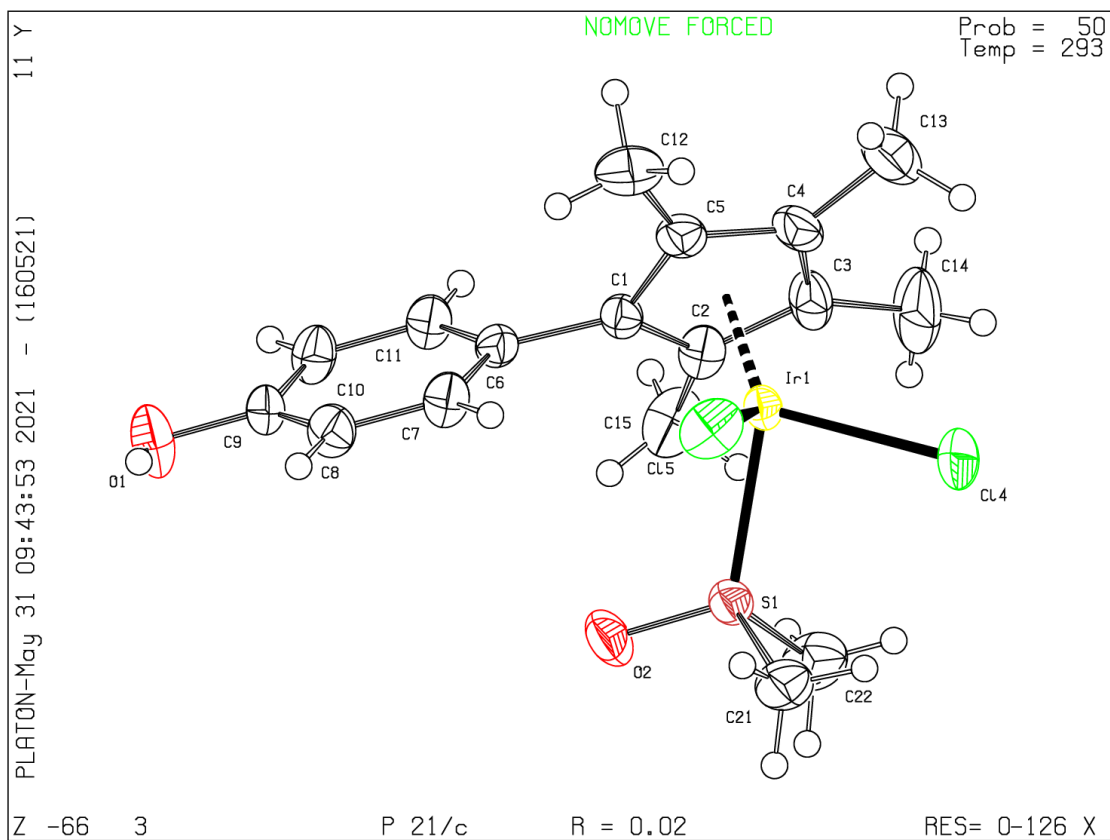

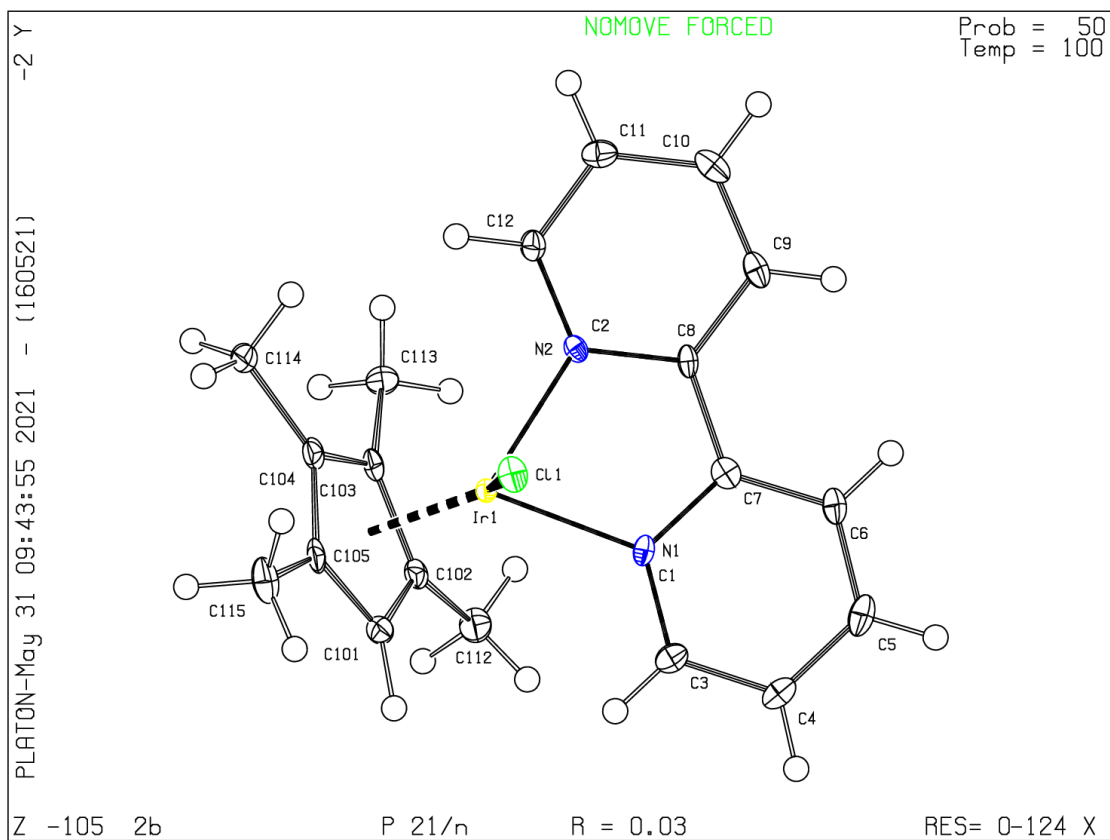

Supplement: s1 [file s1]
