# Supplementary material for: A Comparative Analysis of the In Vitro Anticancer Activity of Iridium(III) {η5-C5Me4R} Complexes with Variable R Groups
Source: MDPI journal article supplement (doi:10.3390/ijms22147422), 2021-07-10

# A Comparative Analysis of the In Vitro Anticancer Activity of Iridium(III) $\{\eta^5\text{-C}_5\text{Me}_4\text{R}\}$ Complexes with Variable R Groups

Alice De Palo,<sup>a</sup> Dijana Draca,<sup>b</sup> Maria Grazia Murrall,<sup>a</sup> Stefano Zacchini,<sup>c</sup> Guido Pampaloni,<sup>a</sup> Sanja Mijatovic,<sup>b</sup> Danijela Maksimovic-Ivanic,<sup>b,\*</sup> Fabio Marchetti<sup>a,\*</sup>

<sup>a</sup> University of Pisa, Dipartimento di Chimica e Chimica Industriale, Via Moruzzi 13, I-56124 Pisa, Italy.

<sup>b</sup> University of Belgrade, Department of Immunology, Institute for Biological Research “Sinisa Stankovic” - National Institute of Republic of Serbia, 11060 Belgrade, Serbia.

<sup>c</sup> University of Bologna, Dipartimento di Chimica Industriale “Toso Montanari”, Viale Risorgimento 4, I-40136 Bologna, Italy.

## Supporting Information

| <b><u>Table of contents</u></b>                                                                 | <i>Pages</i> |
|-------------------------------------------------------------------------------------------------|--------------|
| <b>Figures S1-S15:</b> NMR spectra of complexes                                                 | S2-S10       |
| <b>Figures S16:</b> Effect of <b>1b,c-e</b> on viability of A2780 cells                         | S11          |
| <b>Figures S17:</b> Effect of <b>2a-d</b> and <b>3</b> on viability of A2780 cells              | S12          |
| <b>Figures S18:</b> Effect of <b>2b</b> and <b>2d</b> on viability of macrophages               | S13          |
| <b>Figures S19:</b> Autophagosomes presence in A2780 cells treated with <b>2b</b> and <b>2d</b> | S14          |

**Figure S1.**  $^1\text{H}$  NMR spectrum (401 MHz,  $\text{CDCl}_3$ ) of **2b**

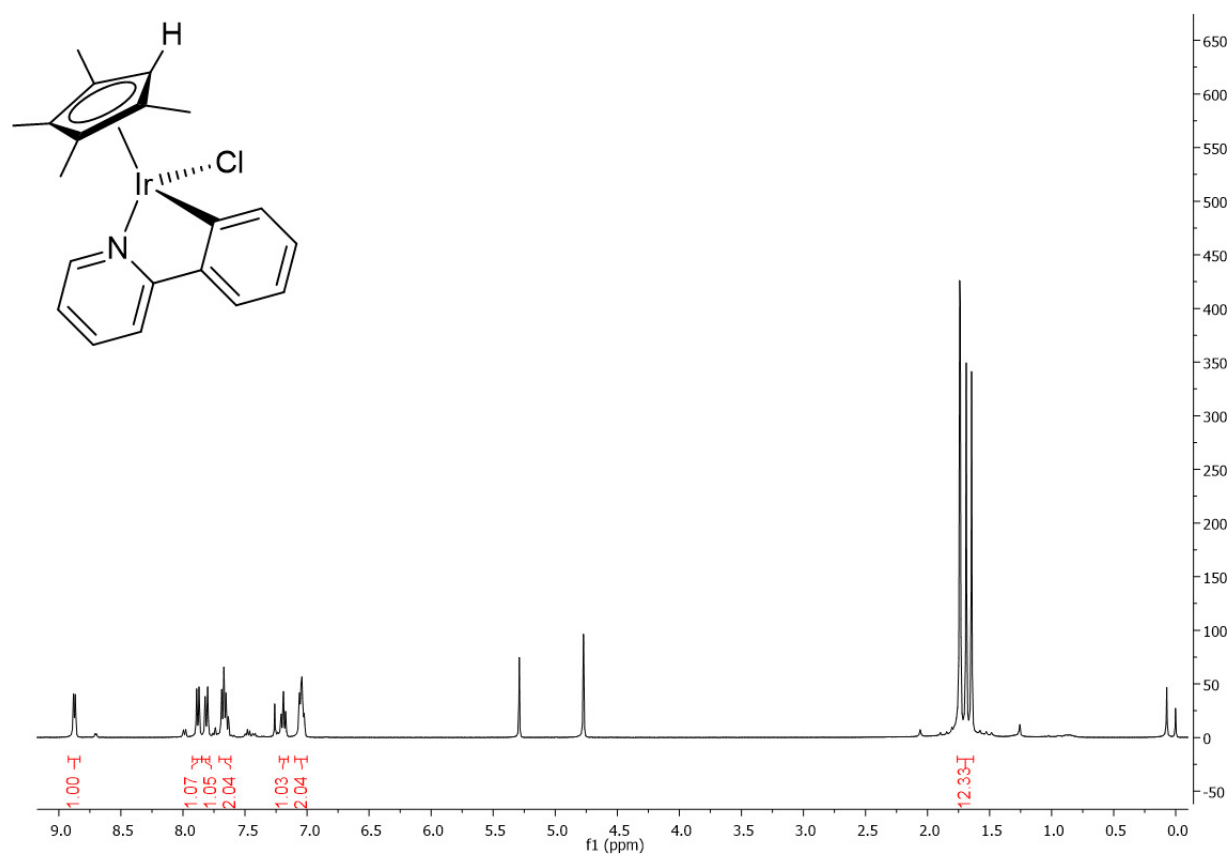

**Figure S2.**  $^{13}\text{C}\{^1\text{H}\}$  NMR spectrum (101 MHz,  $\text{CDCl}_3$ ) of **2b**.

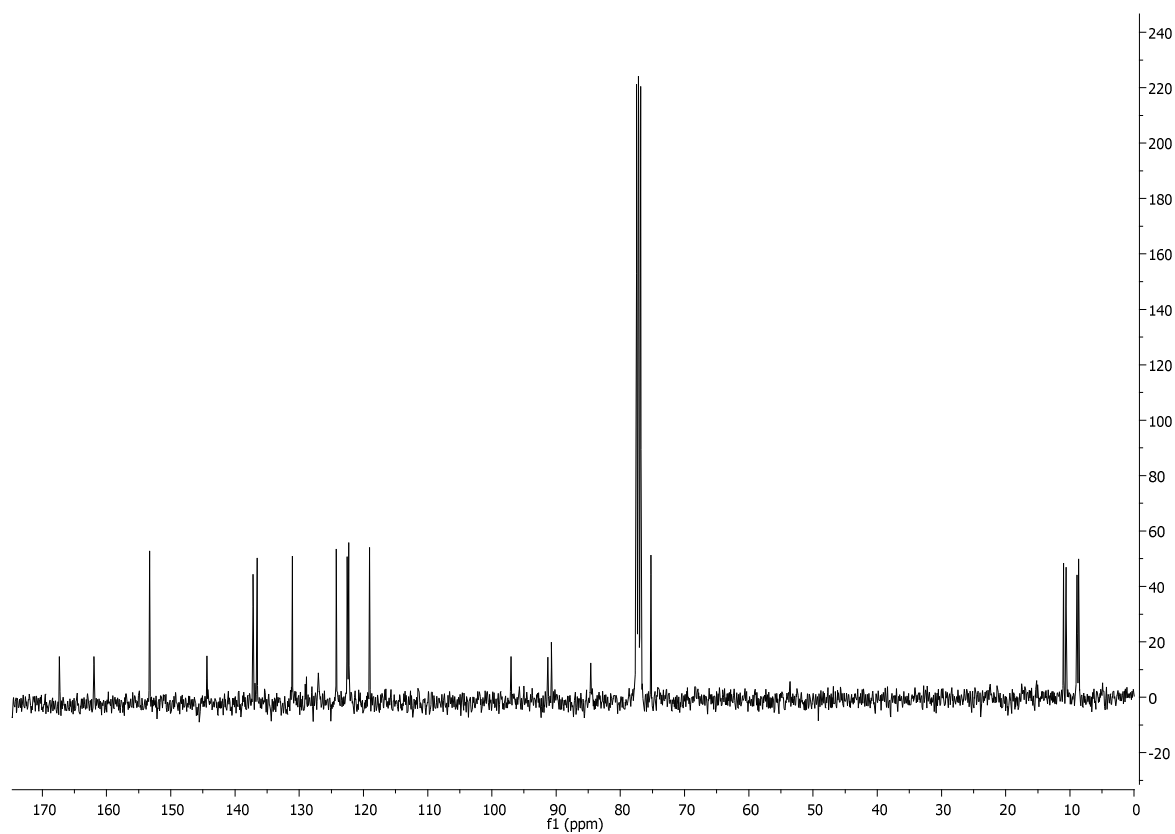

Figure S3.  $^1\text{H}$  NMR spectrum (401 MHz,  $\text{CDCl}_3$ ) of 2c.

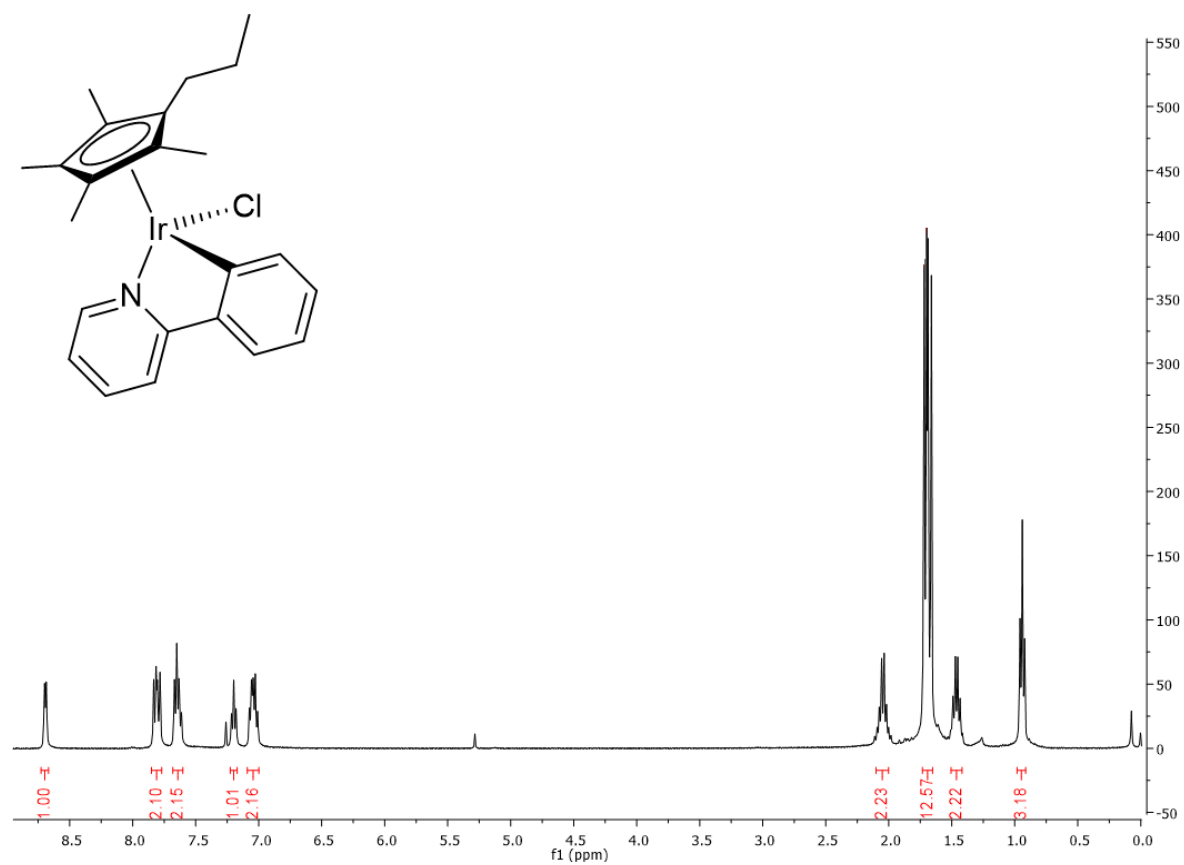

Figure S4.  $^{13}\text{C}\{^1\text{H}\}$  NMR spectrum (101 MHz,  $\text{CDCl}_3$ ) of 2c.

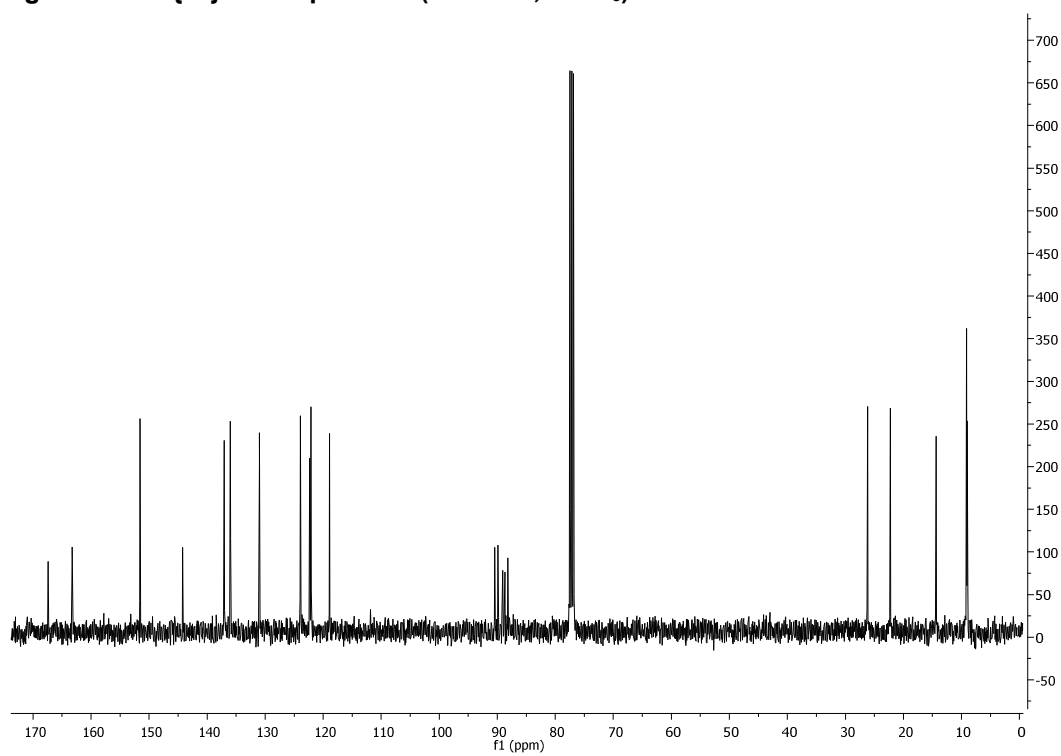

Figure S5.  $^1\text{H}$  NMR spectrum (401 MHz,  $\text{CDCl}_3$ ) of 2d.

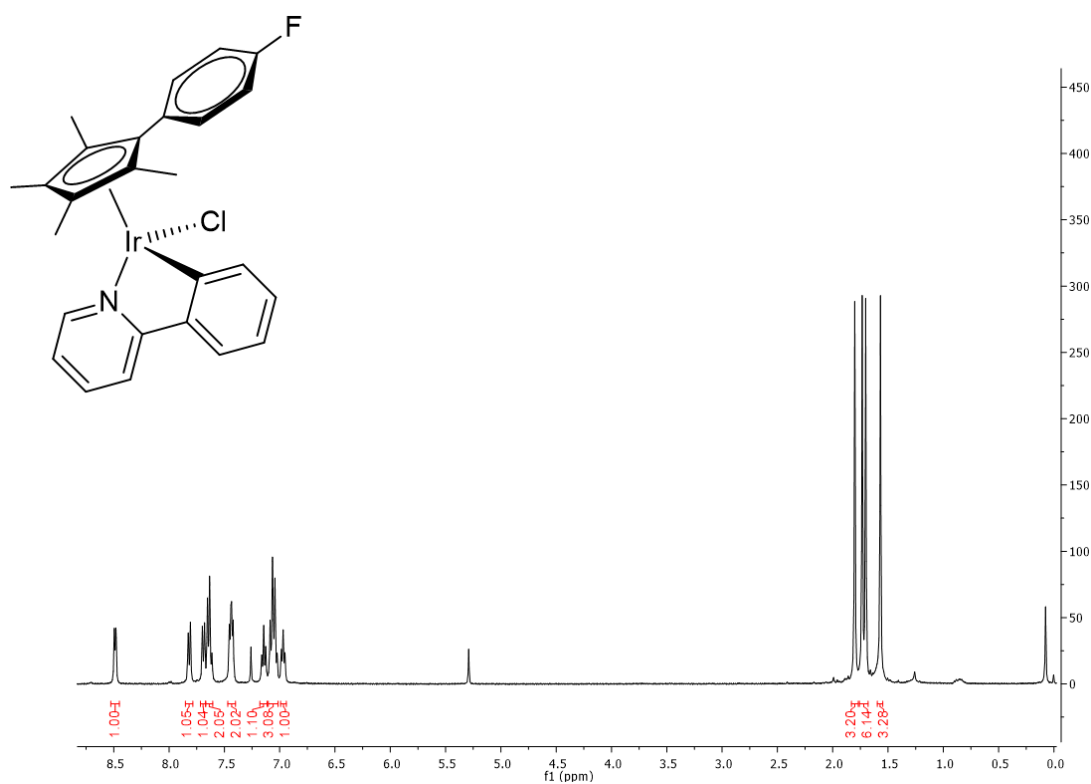

Figure S6.  $^{13}\text{C}\{^1\text{H}\}$  NMR spectrum (101 MHz,  $\text{CDCl}_3$ ) of 2d.

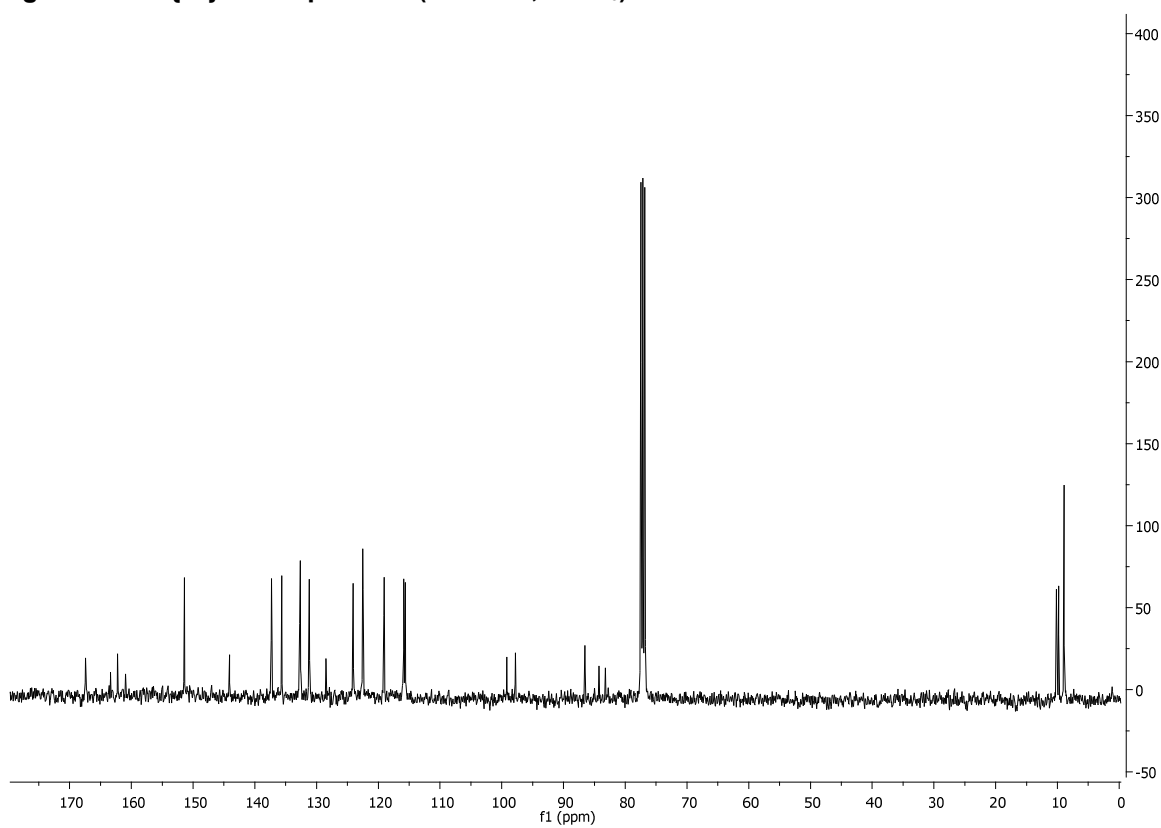

Figure S7.  $^{19}\text{F}\{^1\text{H}\}$  NMR spectrum (378 MHz,  $\text{CDCl}_3$ ) of 2d. Inset shows the -110 / -120 ppm region.

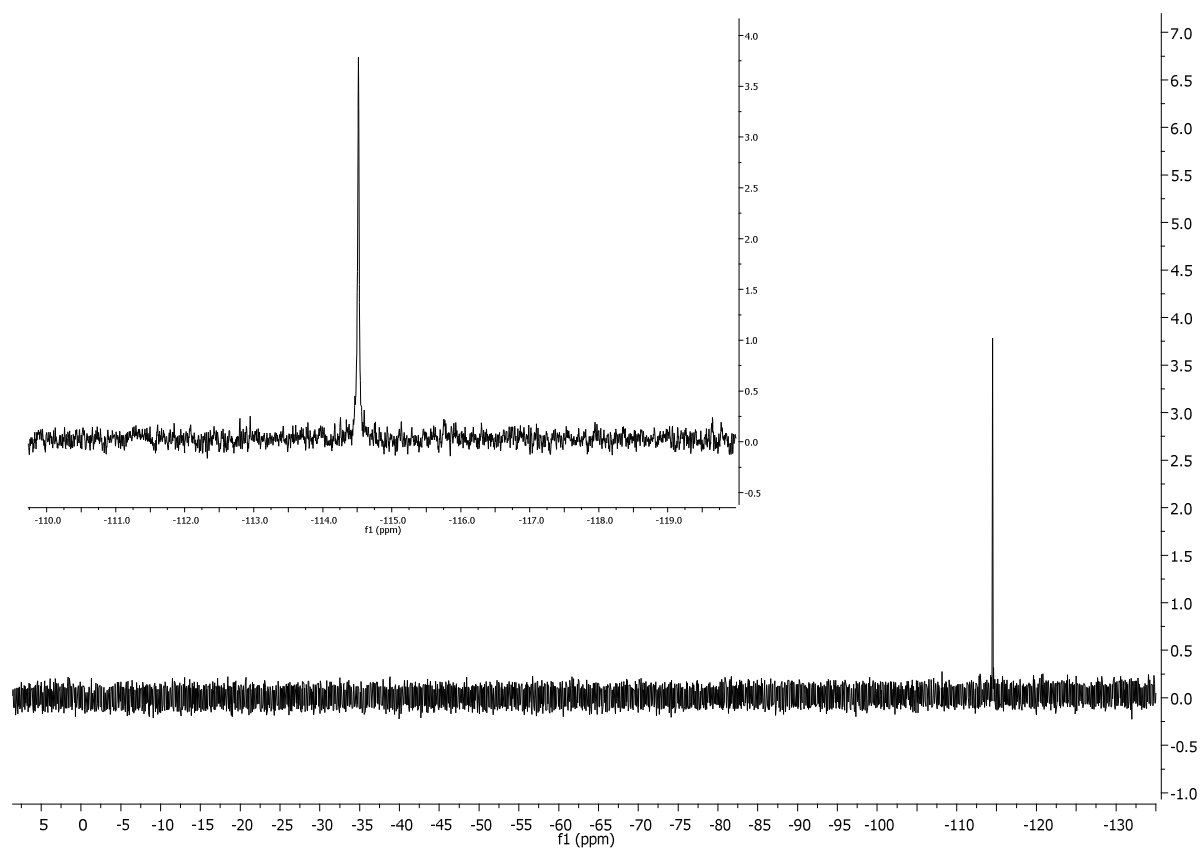

Figure S8.  $^1\text{H}$  NMR spectrum (401 MHz,  $\text{CDCl}_3$ ) of 3.

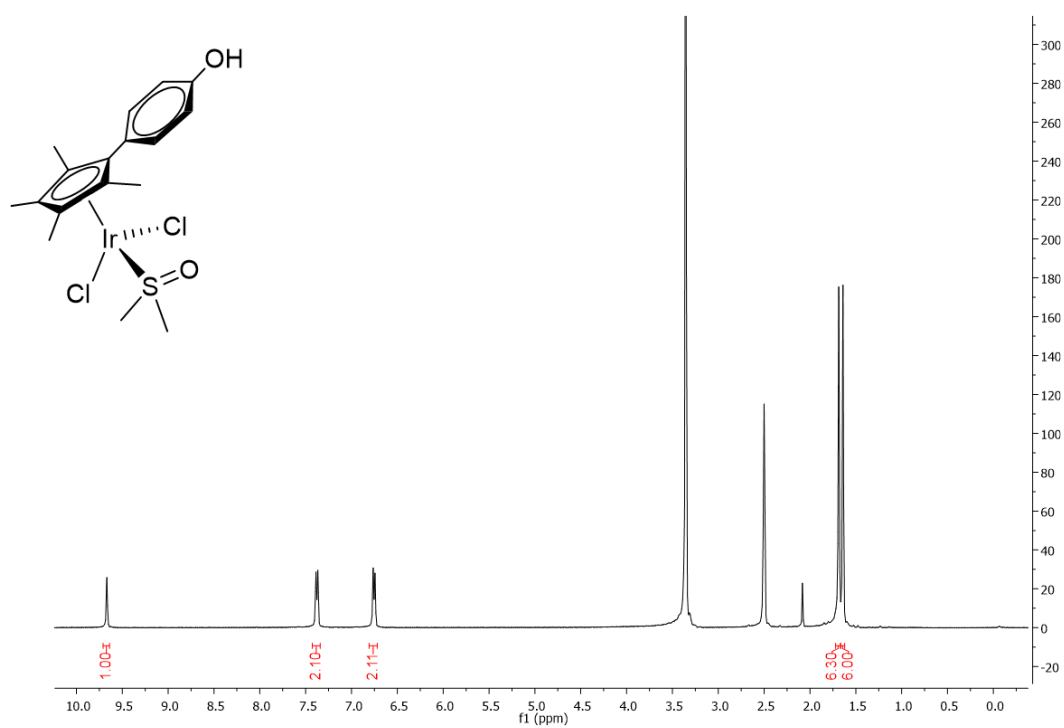

Figure S9.  $^{13}\text{C}\{^1\text{H}\}$  NMR spectrum (101 MHz,  $\text{CDCl}_3$ ) of 3.

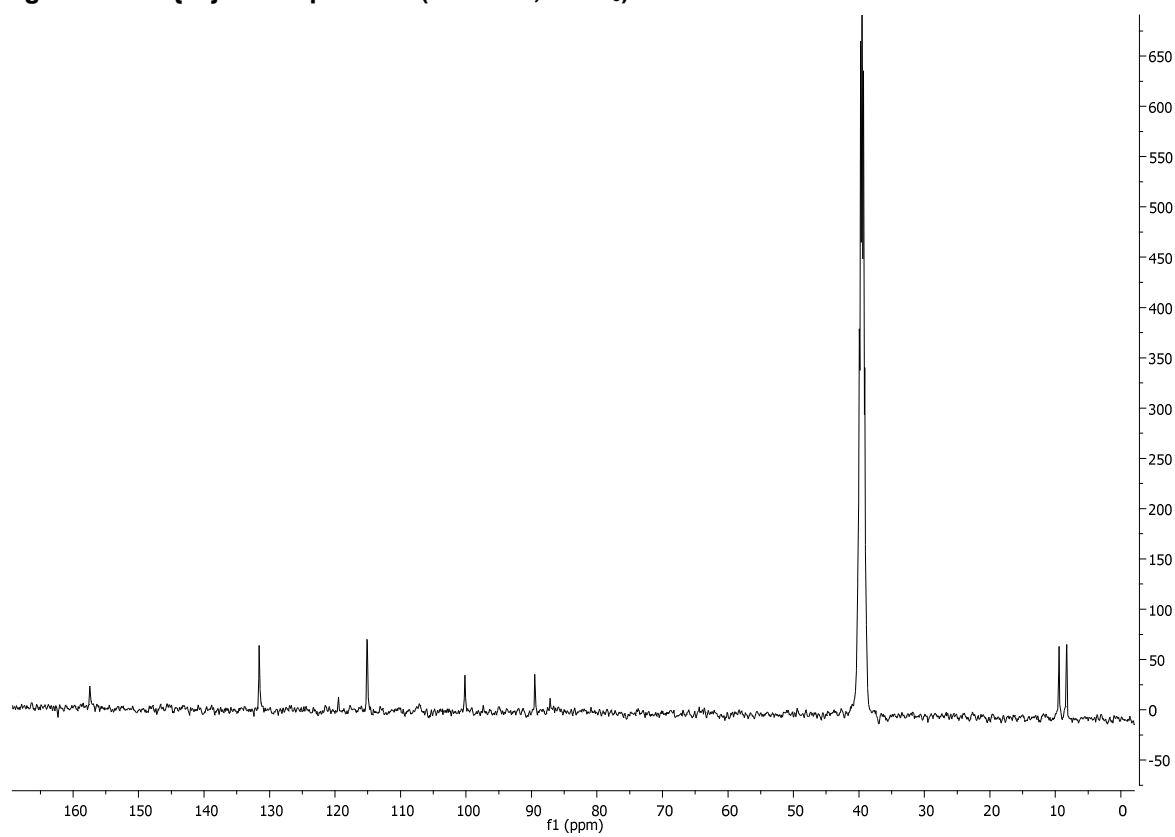

**Figure S10.**  $^1\text{H}$  NMR spectrum (401 MHz,  $\text{dms}\text{-d}_6/\text{D}_2\text{O}$ ) of **2a**.

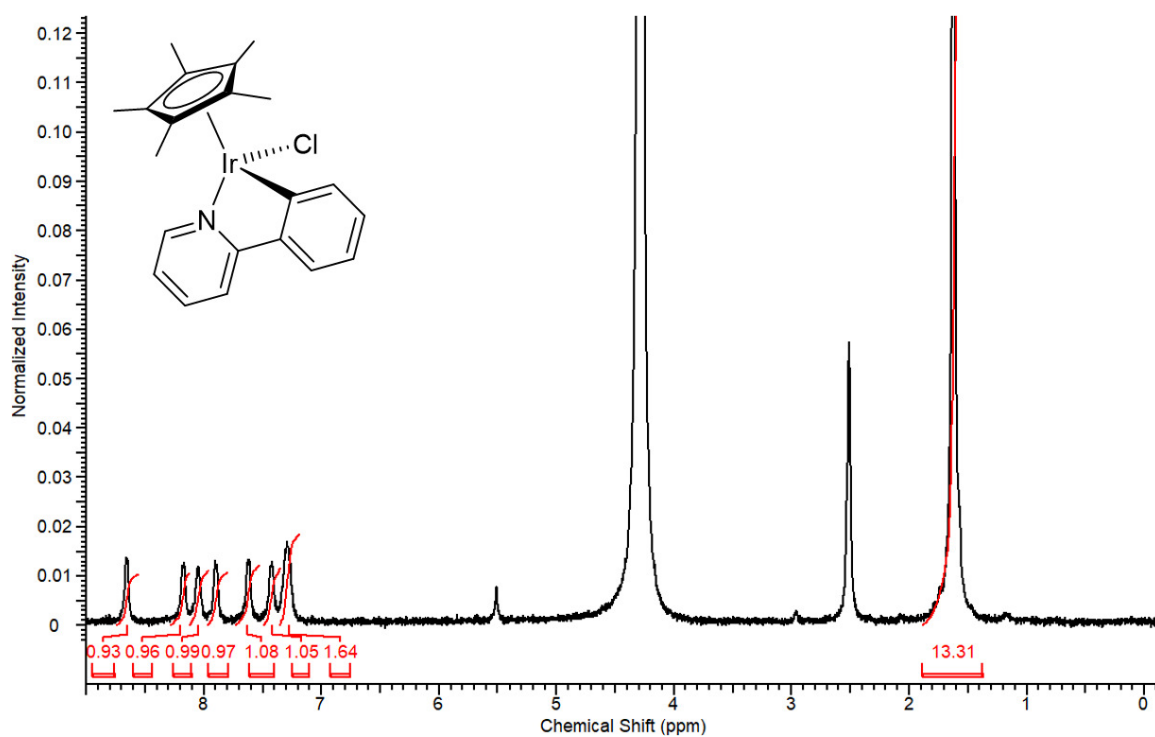

**Figure S11.**  $^1\text{H}$  NMR spectrum (401 MHz,  $\text{dms}\text{-d}_6/\text{D}_2\text{O}$ ) of **2b**.

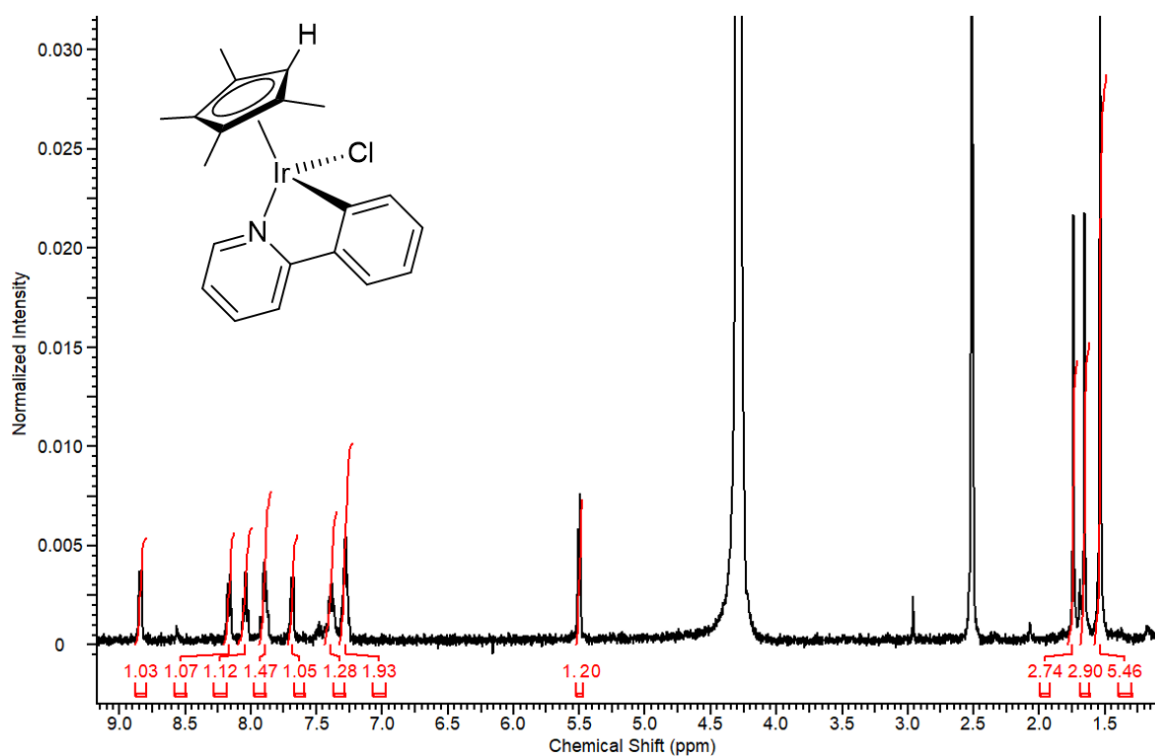

Figure S12.  $^1\text{H}$  NMR spectrum (401 MHz,  $\text{dms}\text{-d}_6/\text{D}_2\text{O}$ ) of 2c.

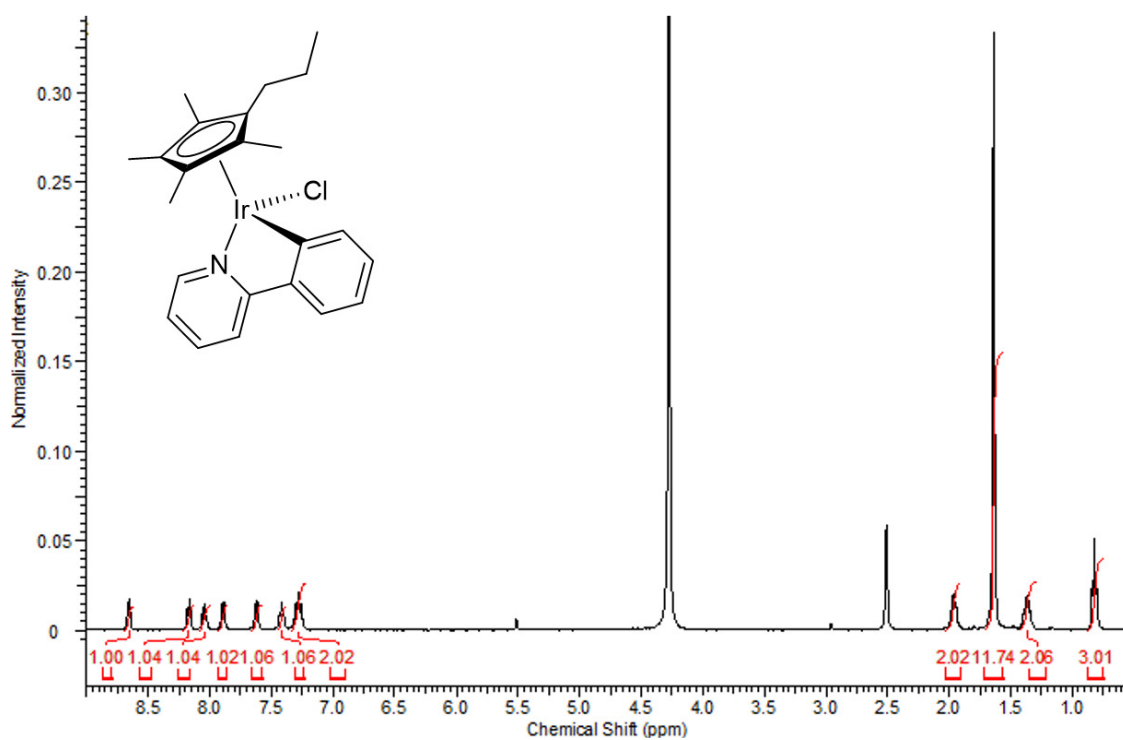

Figure S13.  $^1\text{H}$  NMR spectrum (401 MHz,  $\text{dms}\text{-d}_6/\text{D}_2\text{O}$ ) of 2d.

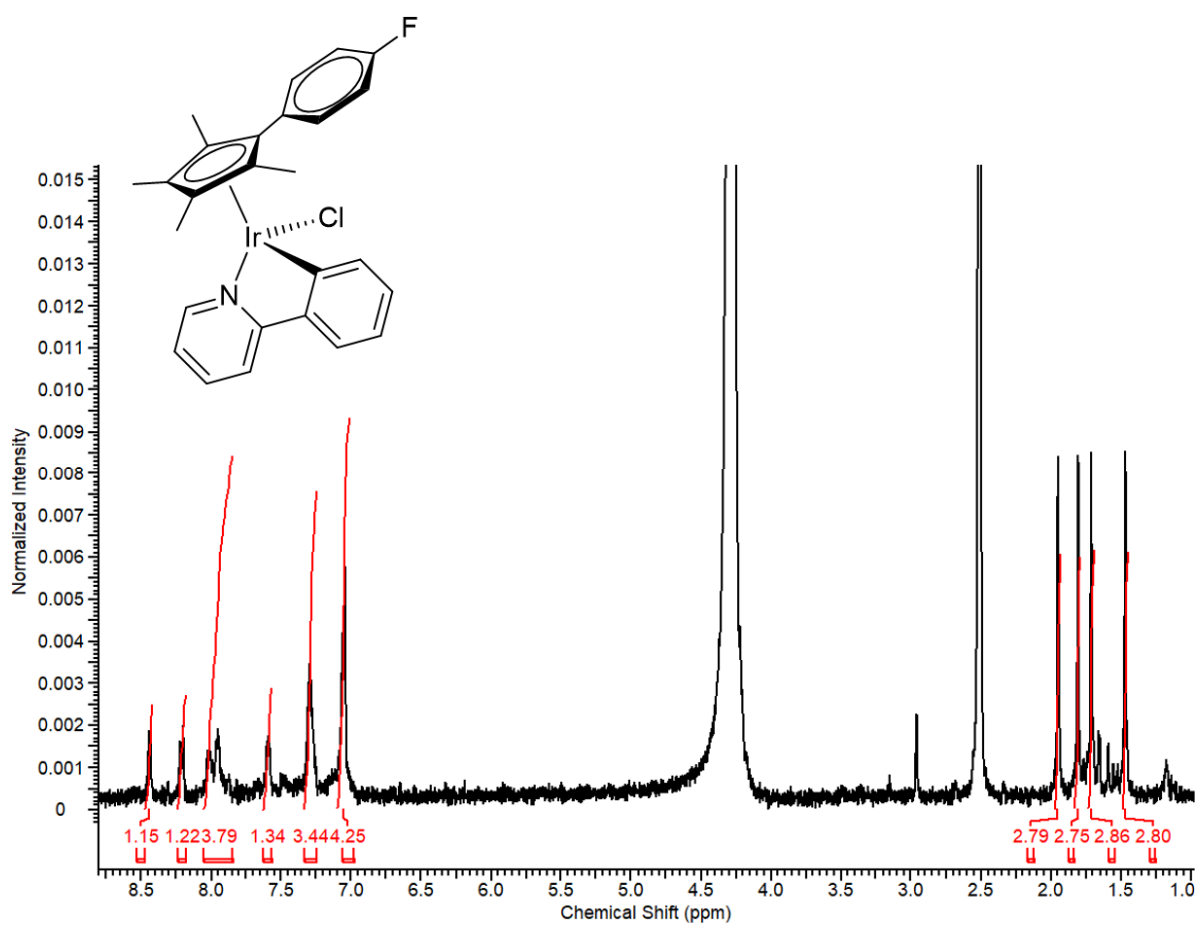



Figure S14.  $^{19}\text{F}\{^1\text{H}\}$  NMR spectrum (378 MHz,  $\text{dms}\text{-d}_6/\text{D}_2\text{O}$ ) of 2d.

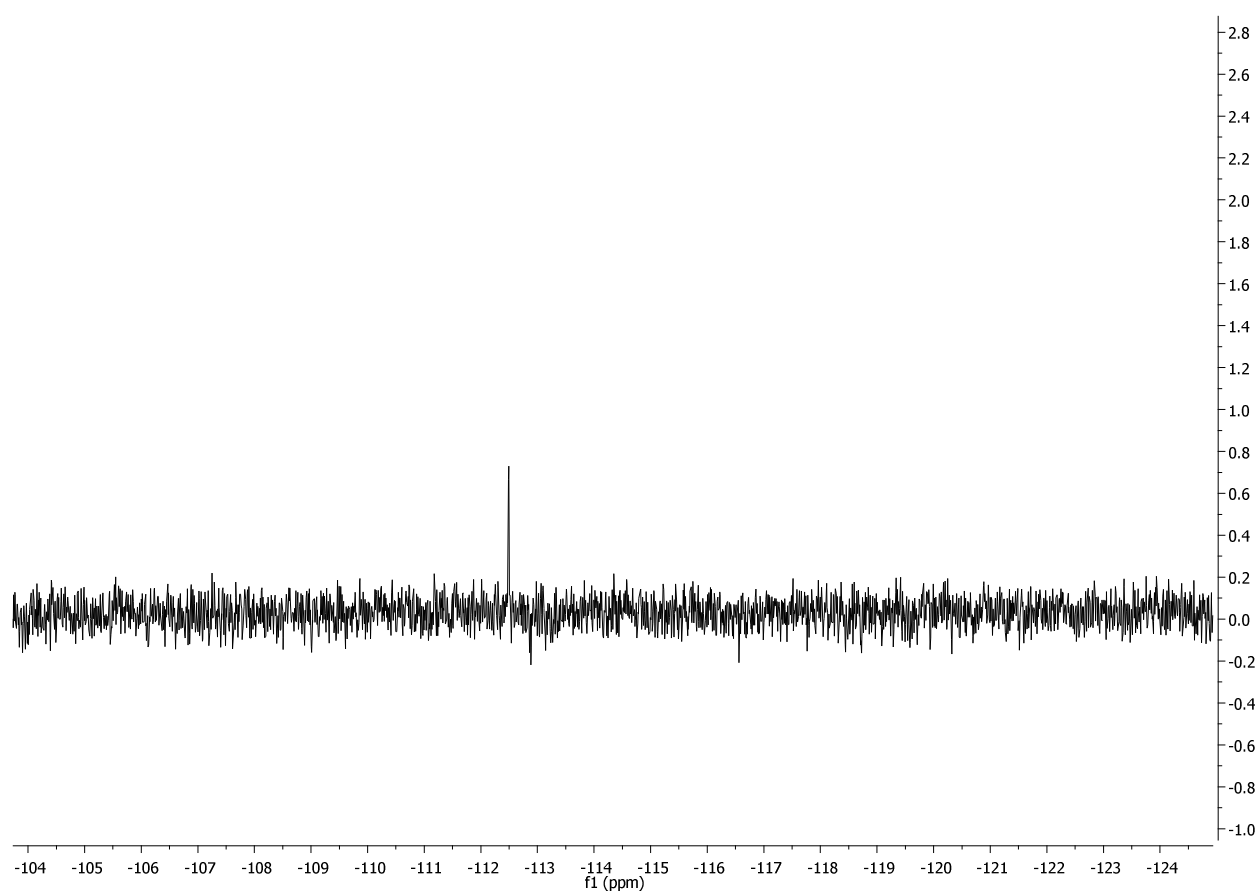

Figure S15.  $^1\text{H}$  NMR spectrum (401 MHz,  $\text{dms}\text{-d}_6/\text{D}_2\text{O}$ ) of 3.

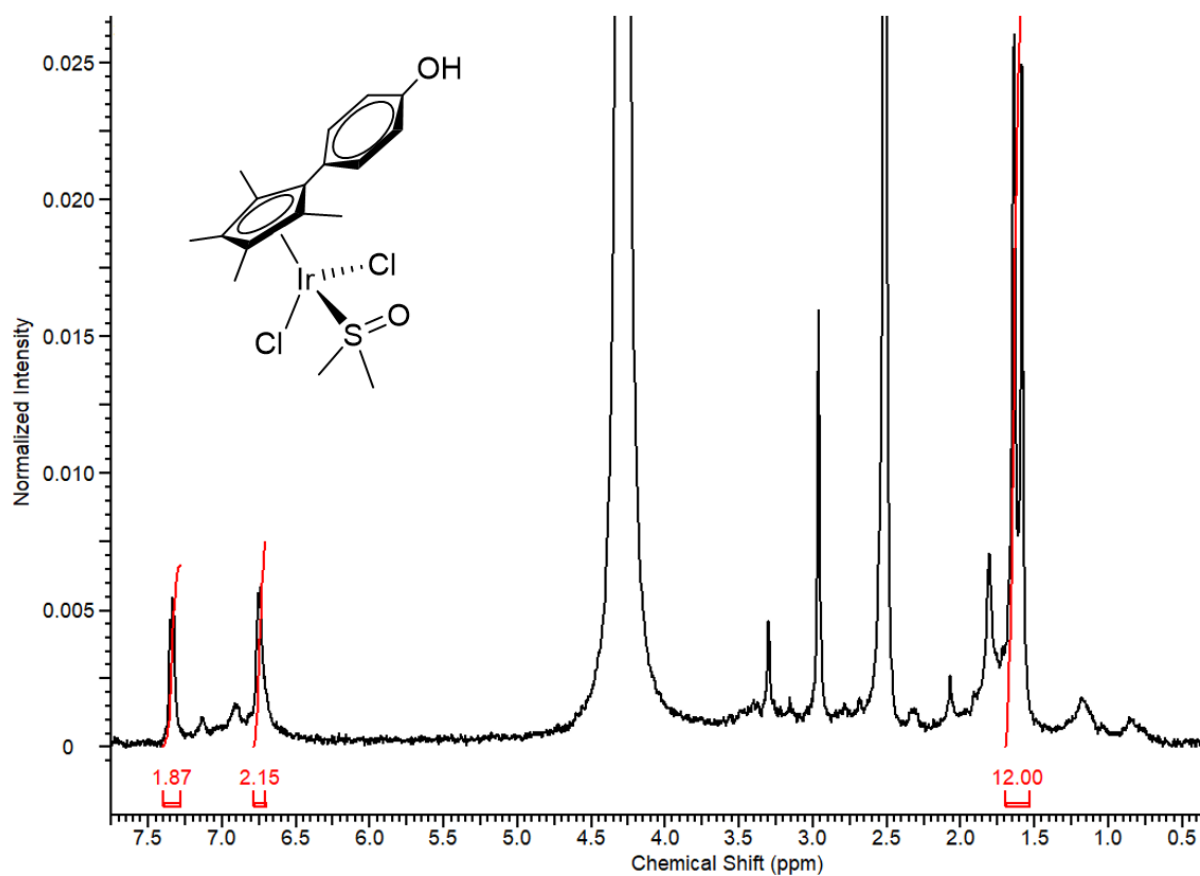

**Figure S16.** Effect of **1b,c-e** on viability of A2780 cells (left panel – MTT assay, right panel – CV assay; \*  $p < 0.05$  refers to untreated culture).

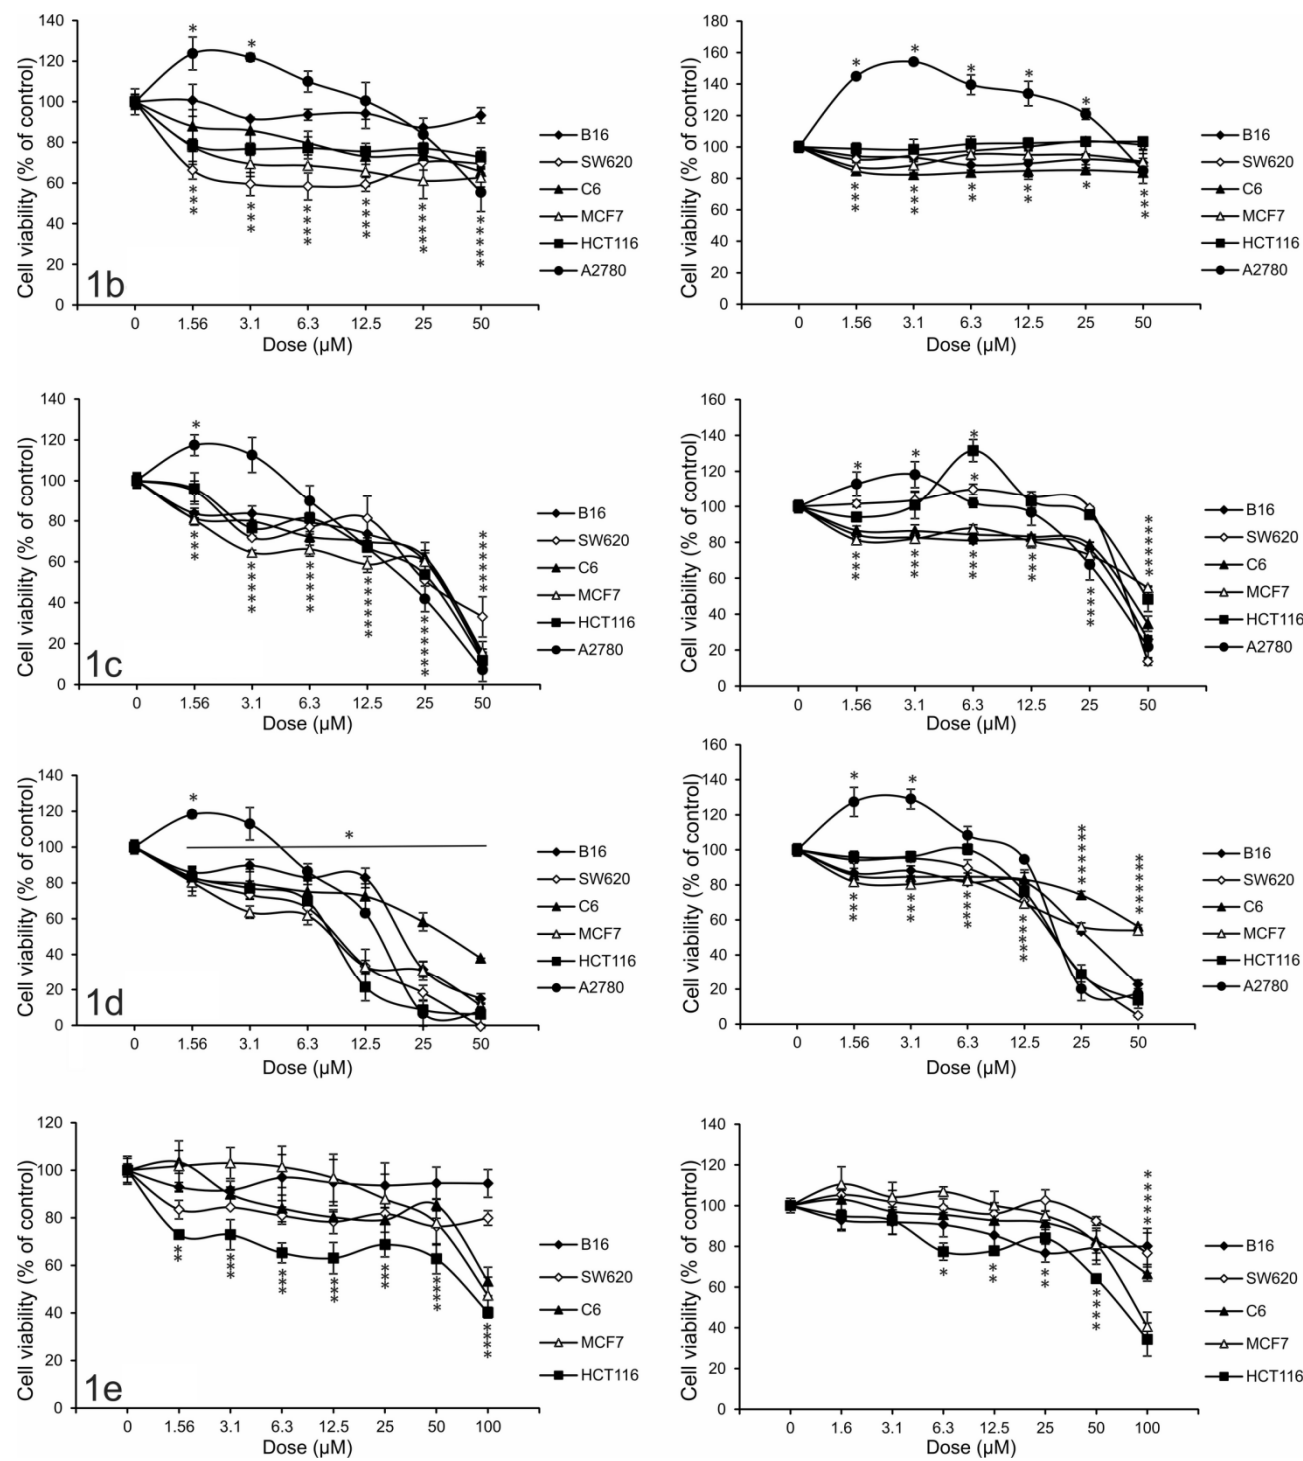

**Figure S17.** Effect of **2a-d** and **3** on viability of A2780 cells (left panel – MTT assay, right panel – CV assay; \*  $p < 0.05$  refers to untreated cultures).

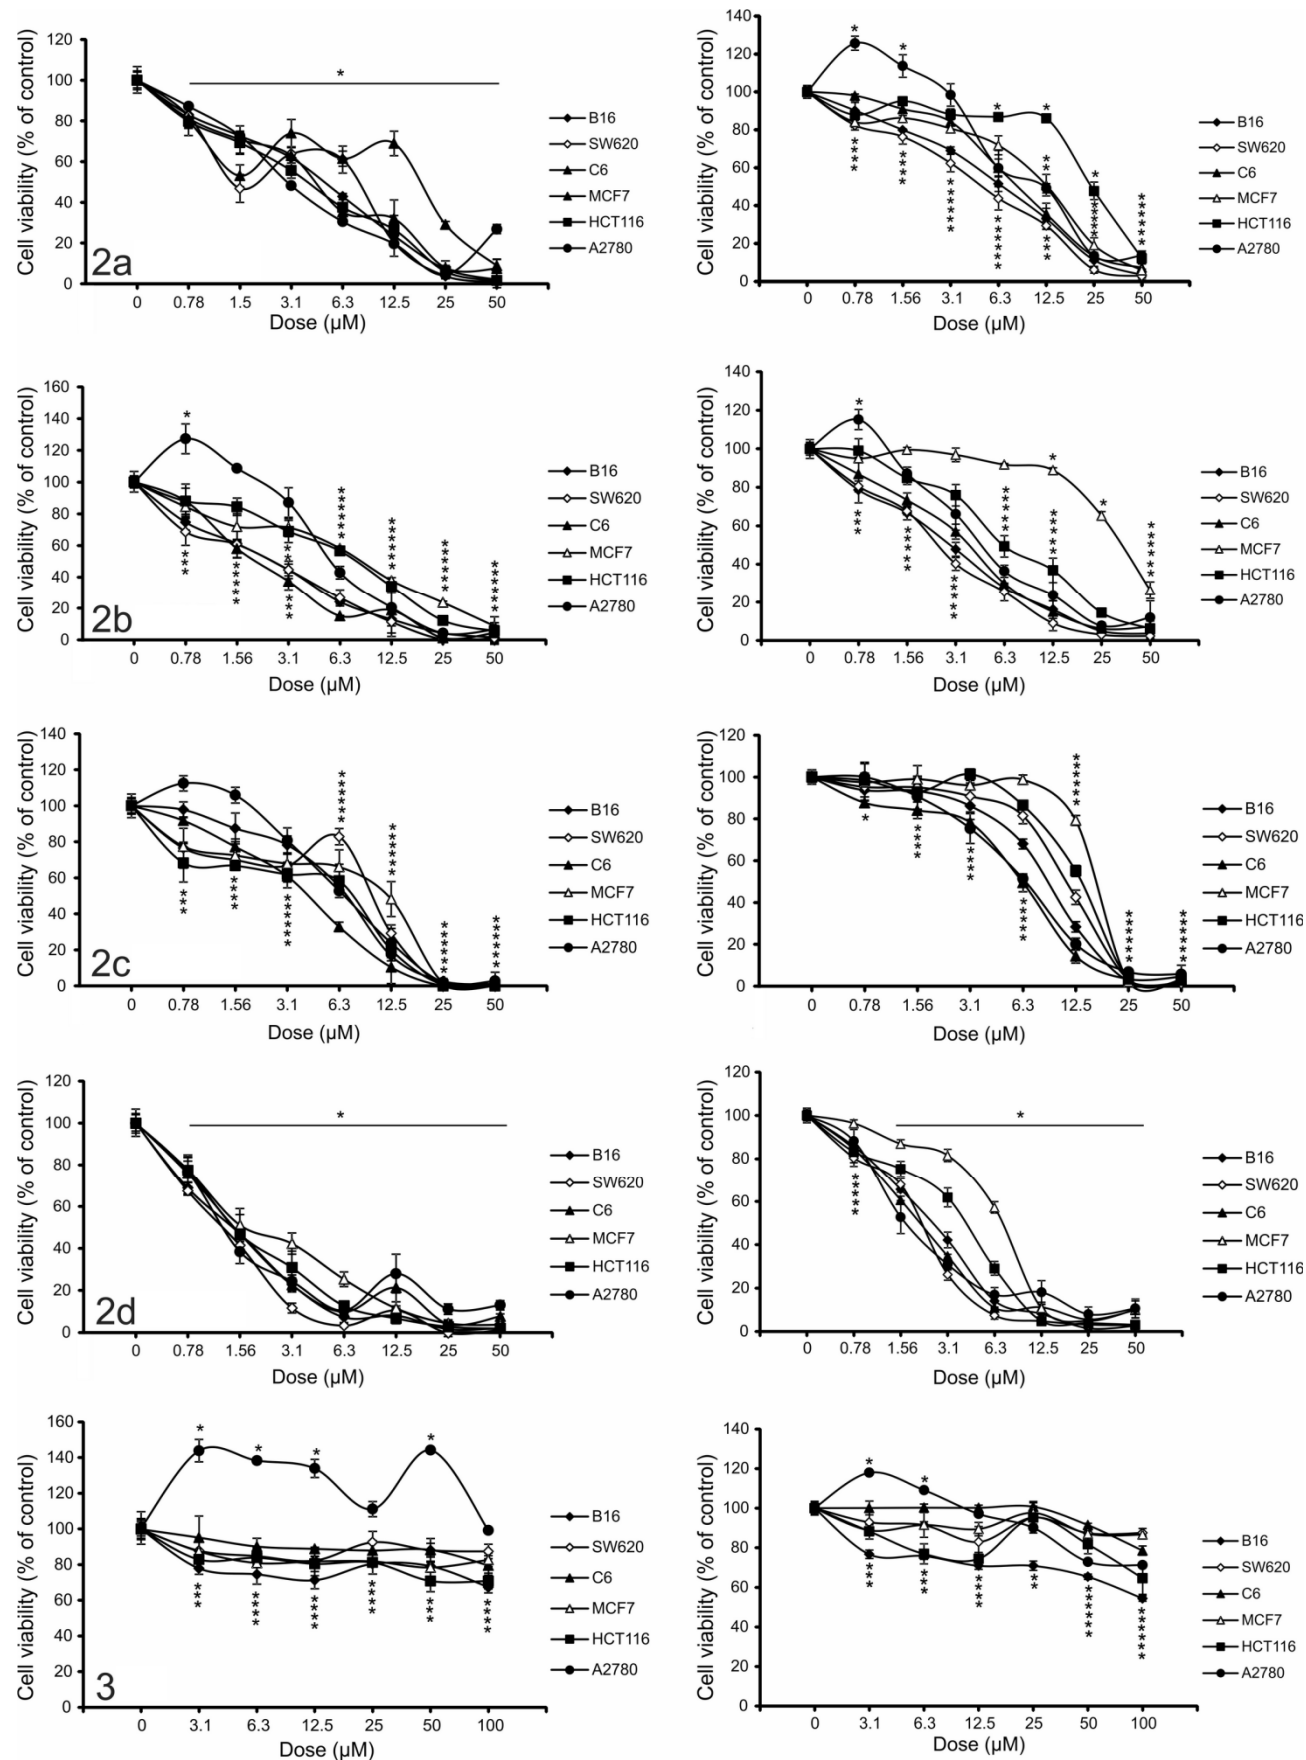

**Figure S18.** Effect of **2b** and **2d** on viability of macrophages (CV assay; \* p < 0.05 refers to untreated culture).

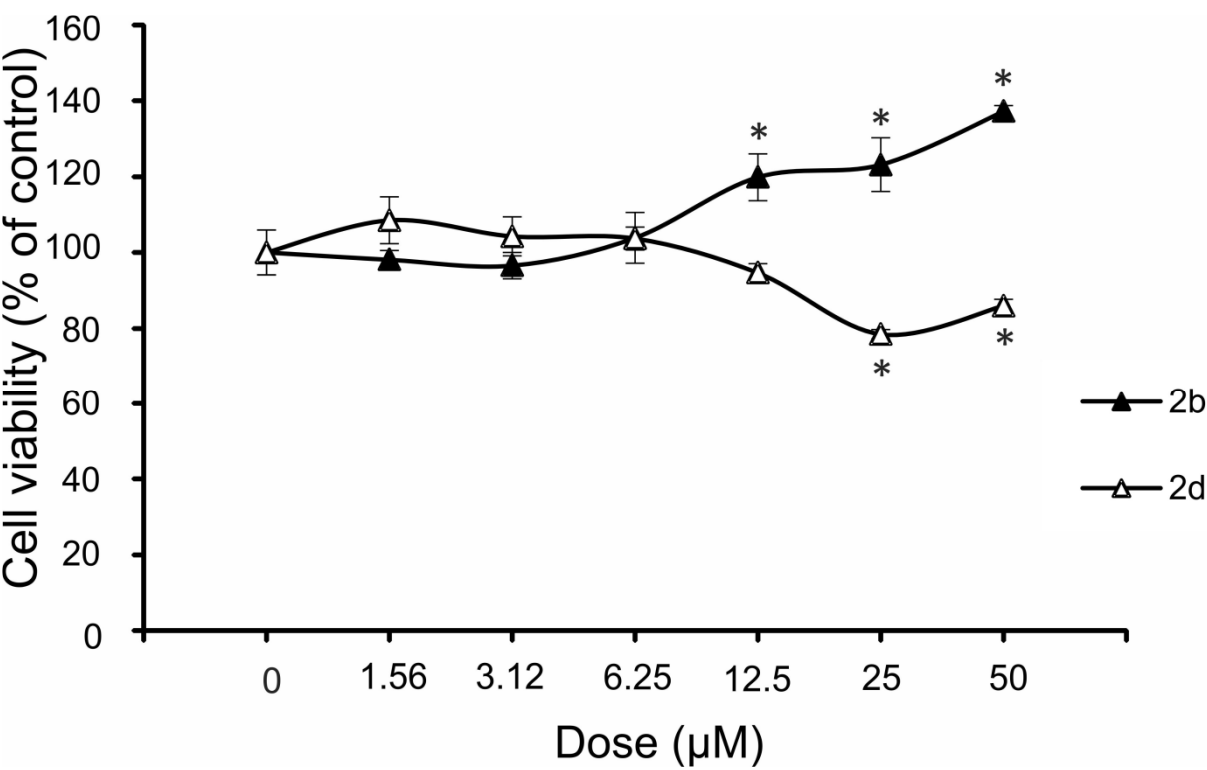

**Figure S19.** Autophagosomes presence (AO assay) in A2780 cells treated with **2b** and **2d**.

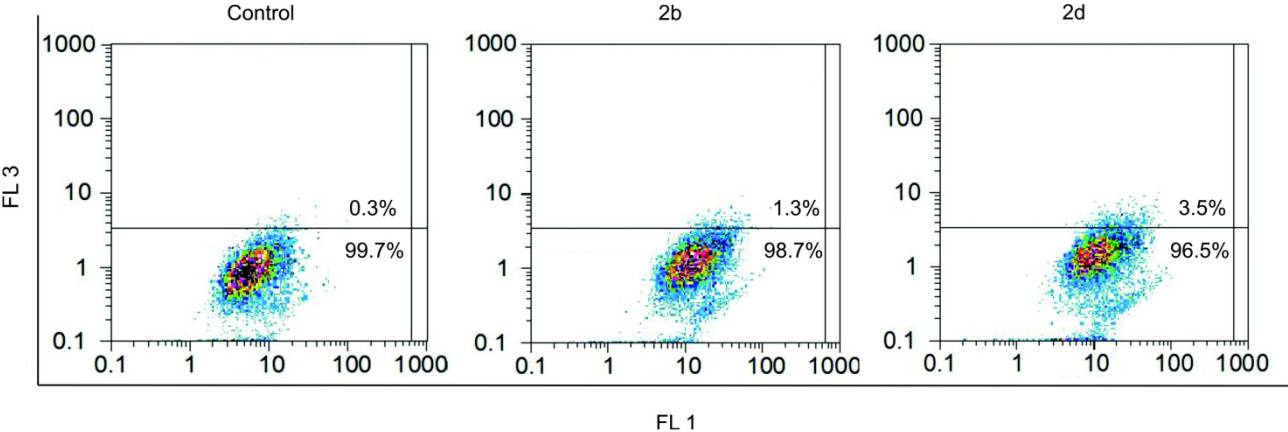

Supplement: s1 [file s1]
